# Supplementary material for: What a stranded whale with scoliosis can teach us about human idiopathic scoliosis
Source: Sci Rep. 2021 Mar 30;11:7218. doi: 10.1038/s41598-021-86709-x (PMC8009909; doi:10.1038/s41598-021-86709-x)
Supplement: Supplementary file 1 — Supplementary Information. [file 41598_2021_86709_MOESM1_ESM.xlsx]

## Sheet: Title Page
What a stranded whale with scoliosis can teach us about human idiopathic scoliosis
Steven de Reuver1, Lonneke L. IJsseldijk2, Jelle F. Homans1, Dorien S. Willems3, Stefanie Veraa3, Marijn van Stralen4, Marja J.L. Kik2, Moyo C. Kruyt1, Andrea Gröne2, René M. Castelein1
1Department of Orthopaedic Surgery, University Medical Center Utrecht, Utrecht, the Netherlands.
2Division of Pathology, Department of Biomolecular Health Sciences, Faculty of Veterinary Medicine, Utrecht University, Utrecht, the Netherlands.
3Division of Diagnostic Imaging, Department of Clinical Sciences, Faculty of Veterinary Medicine, Utrecht University, Utrecht, the Netherlands.
4Imaging Division, University Medical Center Utrecht, Utrecht, the Netherlands.
Correspondence and requests for materials should be addressed to Lonneke L. IJsseldijk (email: l.l.ijsseldijk@uu.nl).

## Sheet: Figure 4
	Rotation
Level	degrees (°)
T5	0
T6	-2.9
T7	-4.8
T8	-3.4
T9	0.3
T10	8.6
T11	22.6
T12	34.8
L1	22.8
L2	9.5
L3	-5.9
L4	-19
L5	-10.3
L6	1.5

## Sheet: Figure 5
	Case	Controls
Level	AP%	AP%	SD
T5	-0.01	-0.03	0.02
T5/6	0.01	-0.1	0.12
T6	-0.02	-0.02	0.02
T6/7	0.52	-0.13	0.06
T7	-0.03	-0.02	0.02
T7/8	0.6	-0.12	0.06
T8	-0.05	-0.02	0.01
T8/9	1.07	-0.09	0.09
T9	-0.05	-0.02	0.01
T9/10	1.2	-0.05	0.06
T10	-0.03	-0.01	0.02
T10/11	1.46	-0.03	0.03
T11	N/A	-0.02	0.01
T11/12	N/A	-0.04	0.07
T12	N/A	-0.01	0.01
T12/L1	2.11	-0.03	0.11
L1	0.01	-0.01	0.01
L1/2	1.94	-0.01	0.08
L2	-0.02	-0.01	0.01
L2/3	0.46	0.01	0.08
L3	N/A	-0.01	0.02
L3/4	N/A	0.02	0.22
L4	N/A	-0.01	0.01
L4/5	1.55	0.02	0.16
L5	0.02	-0.02	0.04
L5/6	0.72	0.06	0.27
L6	-0.05	-0.03	0.03
